# Supplementary material for: Altered monocytic phenotypes are linked with systemic inflammation and may be linked to mortality in dialysis patients
Source: PubMed Central journal article supplement (PMC6911068; doi:10.1038/s41598-019-55592-y), 2019-12-13
Supplement: 41598_2019_55592_MOESM1_ESM.pdf [file 41598_2019_55592_MOESM1_ESM.pdf]

# **Altered monocytic phenotypes are linked with systemic inflammation and may be linked to mortality in dialysis patients**

**Sabine Brandt, Lara Ewert, Florian G. Scurt, Charlotte Reichardt, Jonathan A. Lindquist, Xenia Gorny, Berend Isermann<sup>1</sup>, Peter R. Mertens<sup>#</sup>**

Department of Nephrology and Hypertension, Diabetes and Endocrinology, Otto-von-Guericke University Magdeburg, Magdeburg, Germany

<sup>1</sup>Institute of Clinical Chemistry and Pathobiochemistry, Otto-von-Guericke University Magdeburg, Magdeburg, Germany

Supplementary Figure 1

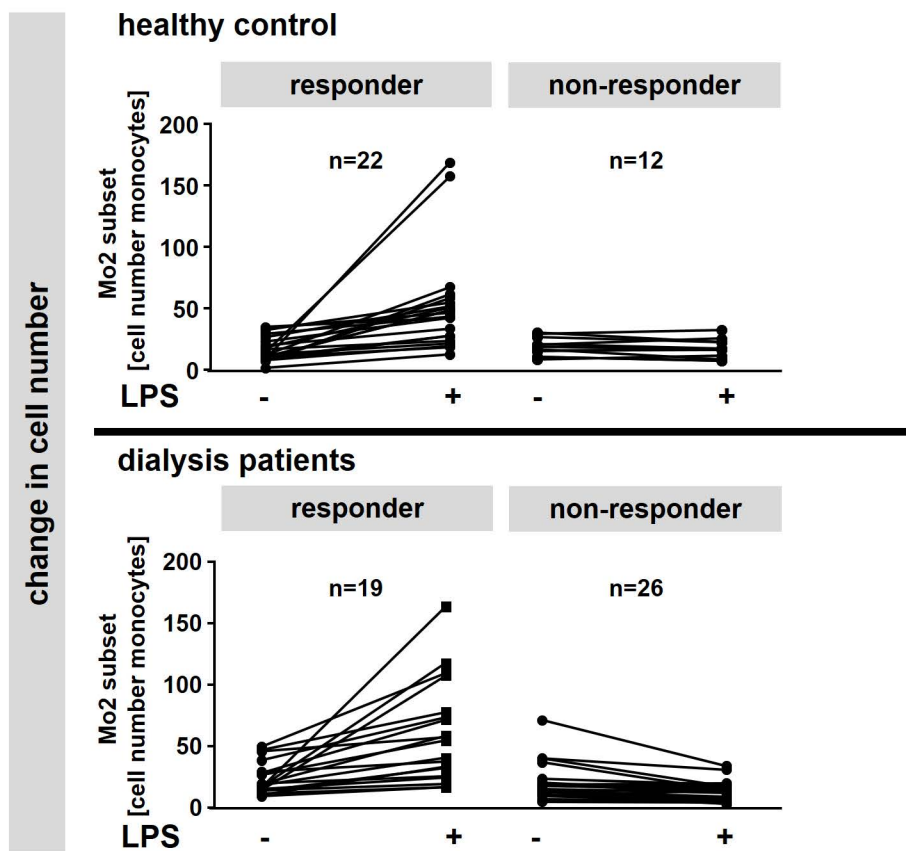

**Supplementary Figure 1.** Diagram representing the changes of Mo2 cell numbers following LPS stimulation in healthy controls and dialysis patients.

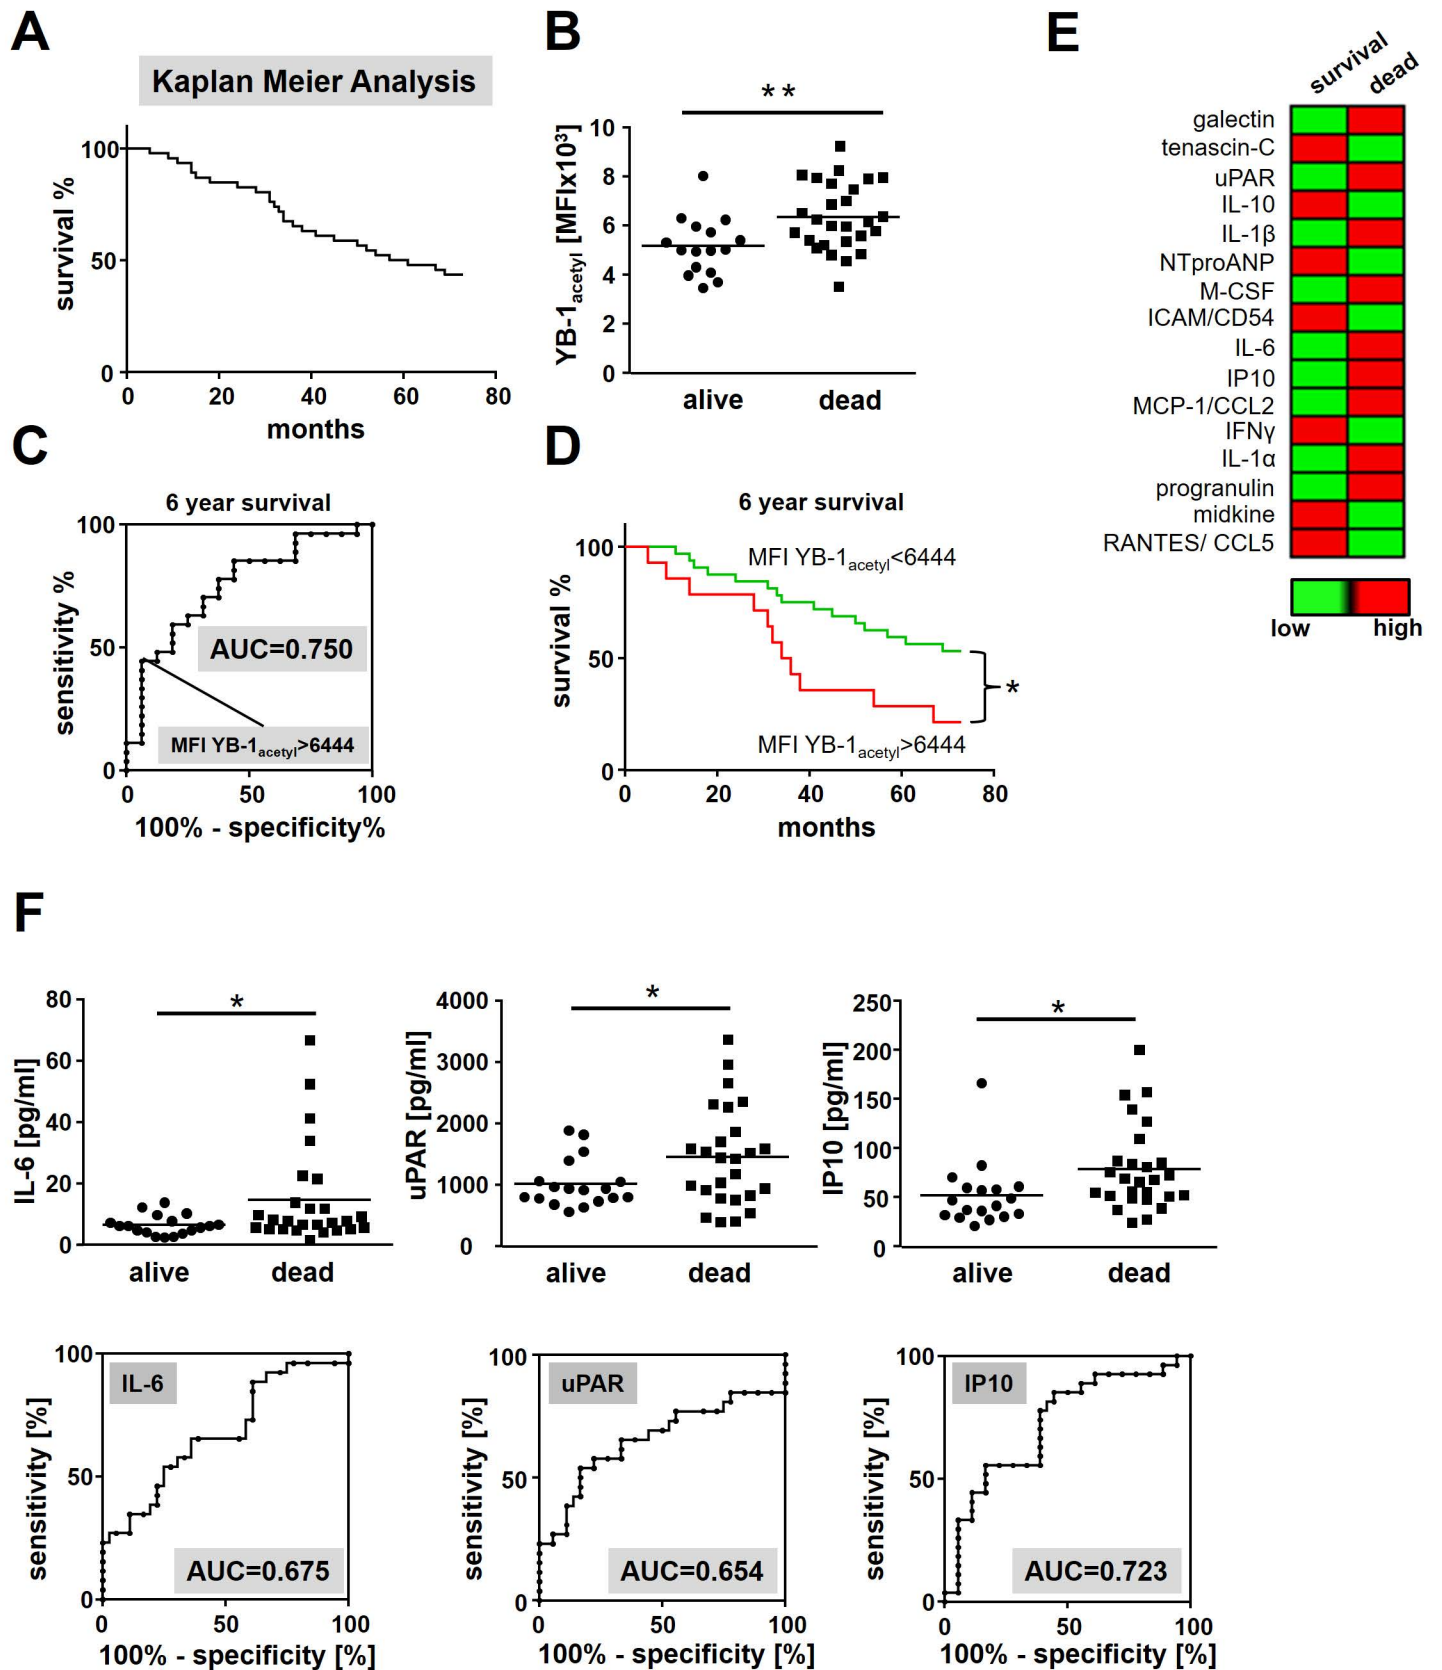

**Supplementary Figure 2.** Correlation of intracellular YB-1acetyl levels and serum cytokine values with survival/mortality of dialysis patients. (A) Kaplan-Meier curve of all dialysis patients within this study. (B) Diagram showing the intracellular YB-1acetyl values of alive and dead patients. (C) Receiver-operator-curve analysis of the YB-1acetyl levels of alive and dead patients. (D) Kaplan-Meier curves by MFI of YB-1acetyl above or less 6444. (E) Heat map analysis of cytokines/chemokines comparing the survival and dead group of dialysis patients. (F) Diagrams illustrating the serum levels of IL-6, uPAR, and IP10 of the survival group compared to the deceased patients. Below the corresponding receiver-operator-curve analysis is shown. (level of significance: \* $p < 0.05$ ; \*\* $p < 0.005$ )

## Supplementary Table 1

ROC curve analyses for the mentioned cytokines alone or in combination.

|                                                | <b>IL6</b> | <b>uPAR</b>  | <b>IP10</b> | <b>YB-1<sub>acetyl</sub></b> |
|------------------------------------------------|------------|--------------|-------------|------------------------------|
| <b>AUC for one parameter alone</b>             | 0.675      | 0.654        | 0.723       | 0.750                        |
| <b>AUC combined with YB-1<sub>acetyl</sub></b> | 0.791      | <b>0.803</b> | 0.796       |                              |

|                              | <b>IL6</b> | <b>uPAR</b>  | <b>IP10</b> | <b>YB-1<sub>acetyl</sub></b> |
|------------------------------|------------|--------------|-------------|------------------------------|
| <b>IL6</b>                   |            | 0.747        | 0.765       | 0.769                        |
| <b>uPAR</b>                  | 0.747      |              | 0.703       | <b>0.803</b>                 |
| <b>IP10</b>                  | 0.765      | 0.703        |             | 0.769                        |
| <b>YB-1<sub>acetyl</sub></b> | 0.769      | <b>0.803</b> | 0.796       |                              |
